# Supplementary material for: Impairment of a distinct cancer-associated fibroblast population limits tumour growth and metastasis
Source: bioRxiv or medRxiv preprint supplement (doi:10.1101/2020.05.17.100412), 2020-05-17
Supplement: Supplementary file [file media-1.pdf]

# **Impairment of a distinct cancer-associated fibroblast population limits tumour growth and metastasis**

Ute Jungwirth, Antoinette van Weverwijk, Liam Jenkins, John Alexander, David Vicente, Qiong Gao, Syed Haider, Marjan Iravani and Clare M. Isacke

## **SUPPLEMENTARY MATERIAL**

### **Supplementary methods**

#### **Supplementary Tables 1 - 4**

Supplementary Table 1a. | Top 30 upregulated pathways in D2A1-m12 cells compared to D2A1 cells

Supplementary Table 1b. | Top 30 downregulated pathways in D2A1-m12 cells compared to D2A1 cells

Supplementary Table 2 | Antibodies

Supplementary Table 3 | Mission shRNA lentiviral particles targeting Endo180 (*Mrc2*) (Sigma)

Supplementary Table 4 | ON-TARGET *plus* siRNA targeting Endo180 (*Mrc2*) (Dharmacon)

#### **Supplementary Figures 1 - 7**

Supplementary Fig. 1 | Fibroblast expression of Endo180 in solid tumours

Supplementary Fig. 2 | Endo180 promotes metastatic tumour growth in lungs and liver

Supplementary Fig. 3 | Expression of Endo180 in the brain

Supplementary Fig. 4 | Endo180 expression following siRNA- or shRNA-mediated knockdown

Supplementary Fig. 5 | Fibroblast-tumour cell co-culture assays

Supplementary Fig. 6 | Cell spreading on collagen or fibronectin-coated hydrogels

Supplementary Fig. 7 | Comparison of the parental D2A1 line and the D2A1-m12 subline

## Supplementary methods

### Whole exome sequencing

DNA was extracted from tumour cell lines or BALB/c mouse spleen tissue using the DNeasy Blood and Tissue kit. DNA samples were physically sheared to the desired size using a Covaris E Series instrument (Covaris). Paired-end multiplexed library preparation was performed by the Tumour Profiling Unit at the ICR using the SureSelect<sup>XT</sup> Library Prep and Capture System (Agilent Technologies) following the standard protocol workflow, before multiplex sequencing on a NovaSeq 6000 flow cell (Illumina).

Bioinformatics and statistical analyses were performed using custom R scripts and a bespoke DNA sequencing pipeline based on the Nextflow framework<sup>1</sup>. Whole exome sequencing FASTQ files were aligned to the mouse genome assembly build GRCm38 with the Burrows-Wheeler Aligner (BWA) v0.7.12<sup>2</sup>. BWA was run with default parameters utilising 5 threads. The resulting SAM file was converted to BAM and sorted with SAMtools v1.5<sup>3</sup>. Duplicate reads were removed from the sample files with the Picard v2.8.1 suite of tools (<http://broadinstitute.github.io/picard/>). Insert size and coverage metrics were also calculated with Picard. Lastly, base scores were recalibrated with the Genome Analysis Toolkit (GATK) v4.0.3.0<sup>4</sup> according to the GATK Best Practices pipeline.

Copy number analysis (CNA) was carried out with CNVkit v0.9.3<sup>5</sup>, utilising the batch command. A cancer-free sample taken from BALB/c mouse spleen tissue was used as a normal reference for each cell line sample. Copy number log<sub>2</sub> ratios from CNVkit were used to create CNA plots in R statistical programming language v3.5.0 (R Core Team, 2018).

LoFreq<sup>6</sup> was used to call somatic variants. In CNA, the same healthy BALB/c sample was used as a normal reference. Common variants were removed before annotating the remaining variants with ANNOVAR (01/02/2016 release)<sup>7</sup>. The output from ANNOVAR was further processed in R for comparisons between samples and visualisations.

## Supplementary Tables

| Supplementary Table 1a.   Top 30 upregulated pathways in D2A1-m12 cells compared to D2A1 cells |       |       |
|------------------------------------------------------------------------------------------------|-------|-------|
| Pathway                                                                                        | NES   | FDR   |
| mouse.corematrisome.collagens                                                                  | 1.886 | 0.038 |
| mouse.matrisome.associated.ecm.affiliated                                                      | 1.869 | 0.019 |
| mouse.corematrisome.glycoproteins                                                              | 1.836 | 0.024 |
| BIOCARTA_MM_CASPASE_CASCADE_IN_APOPTOSIS                                                       | 1.793 | 0.058 |
| BIOCARTA_MM_THROMBIN_SIGNALING_AND_PROTEASE-ACTIVATED_RECEPTORS                                | 1.792 | 0.038 |
| BIOCARTA_MM_D4-GDI_SIGNALING_PATHWAY                                                           | 1.732 | 0.038 |
| PANTHER_MM_INTEGRIN_SIGNALLING_PATHWAY                                                         | 1.729 | 0.019 |
| BIOCARTA_MM_RHO_CELL_MOTILITY_SIGNALING_PATHWAY                                                | 1.633 | 0.224 |
| mouse.matrisome.associated.regulators                                                          | 1.582 | 0.079 |
| PANTHER_MM_HETEROTRIMERIC_G-PROTEIN_SIGNALING_PATHWAY-GI_ALPHA_AND_GS_ALPHA_MEDIATED           | 1.562 | 0.179 |
| PANTHER_MM_FAS_SIGNALING_PATHWAY                                                               | 1.548 | 0.345 |
| BIOCARTA_MM_PHOSPHOLIPIDS_AS_SIGNALLING_INTERMEDIARIES                                         | 1.540 | 0.353 |
| BIOCARTA_MM_RAC_1_CELL_MOTILITY_SIGNALING_PATHWAY                                              | 1.533 | 0.371 |
| BIOCARTA_MM_INTEGRIN_SIGNALING_PATHWAY                                                         | 1.525 | 0.345 |
| BIOCARTA_MM_RAS-INDEPENDENT_PATHWAY_IN_NK_CELL-MEDIATED_CYTOTOXICITY                           | 1.522 | 0.371 |
| PANTHER_MM_IONOTROPIC_GLUTAMATE_RECEPTOR_PATHWAY                                               | 1.511 | 0.371 |
| BIOCARTA_MM_ROLES_OF_ARRESTIN-DEPENDENT_RECRUITMENT_OF_SRC_KINASES_IN_GPCR_SIGNALING           | 1.493 | 0.393 |
| PANTHER_MM_INFLAMMATION_MEDIATED_BY_CHEMOKINE_AND_CYTOKINE_SIGNALING                           | 1.489 | 0.156 |
| BIOCARTA_MM_ROLE_OF_ARRESTINS_IN_THE_ACTIVATION_AND_TARGETING_OF_MAP_KINASES                   | 1.477 | 0.399 |
| BIOCARTA_MM_SPLICEOSOMAL_ASSEMBLY                                                              | 1.470 | 0.399 |
| BIOCARTA_MM_CCR3_SIGNALING_IN_EOSINOPHILS                                                      | 1.467 | 0.403 |
| BIOCARTA_MM_TGF_BETA_SIGNALING_PATHWAY                                                         | 1.464 | 0.399 |
| NETPATH_MM_ALPHA6_BETA4_INTEGRIN                                                               | 1.423 | 0.371 |
| NETPATH_MM_EGFR1_SIGNALING_PATHWAY                                                             | 1.415 | 0.038 |
| mouse.matrisome.associated.secretedfactors                                                     | 1.409 | 0.345 |
| PANTHER_MM_CYTOSKELETAL_REGULATION_BY_RHO_GTPASE                                               | 1.408 | 0.393 |
| NETPATH_MM_B_CELL_RECEPTOR_SIGNALING_PATHWAY                                                   | 1.403 | 0.314 |
| PANTHER_MM_HETEROTRIMERIC_G-PROTEIN_SIGNALING_PATHWAY-GQ_ALPHA_AND_GO_ALPHA_MEDIATED           | 1.382 | 0.421 |
| PANTHER_MM_HUNTINGTON_DISEASE                                                                  | 1.377 | 0.371 |
| BIOCARTA_MM_MTOR_SIGNALING_PATHWAY                                                             | 1.357 | 0.602 |
| BIOCARTA_MM_TREFOIL_FACTORS_INITIATE_MUCOSAL_HEALING                                           | 1.352 | 0.602 |

Pathways highlighted in yellow have FDR < 0.1. FDR, false discovery rate. NES, normalised enrichment score

| <b>Supplementary Table 1b.   Top 30 downregulated pathways in D2A1-m12 cells compared to D2A1 cells</b> |        |       |
|---------------------------------------------------------------------------------------------------------|--------|-------|
| Pathway                                                                                                 | NES    | FDR   |
| BIOCARTA_MM_SYNAPTIC_PROTEINS_AT_THE_SYNAPTIC_JUNCTION                                                  | -1.606 | 0.345 |
| PANTHER_MM_SYNAPTIC_VESICLE_TRAFFICKING                                                                 | -1.531 | 0.391 |
| PANTHER_MM_INSULIN_IGF_PATHWAY-PROTEIN_KINASE_B_SIGNALING_CASCADE                                       | -1.527 | 0.371 |
| PANTHER_MM_METABOTROPIC_Glutamate_Receptor_Group_I_Pathway                                              | -1.429 | 0.558 |
| BIOCARTA_MM_BONE_REMODELLING                                                                            | -1.404 | 0.602 |
| BIOCARTA_MM_REGULATION_OF_EIF2                                                                          | -1.400 | 0.600 |
| PANTHER_MM_EGF_RECEPTOR_SIGNALING_PATHWAY                                                               | -1.321 | 0.393 |
| BIOCARTA_MM_TELOMERES_TELOMERASE_CELLULAR_AGING_AND_IMMORTALITY                                         | -1.299 | 0.646 |
| PANTHER_MM_MUSCARINIC_ACETYLCHOLINE_RECEPTOR_1_AND_3_SIGNALING_PATHWAY                                  | -1.272 | 0.614 |
| BIOCARTA_MM_TOLL-LIKE_RECEPTOR_PATHWAY                                                                  | -1.271 | 0.602 |
| PANTHER_MM_P53_PATHWAY_FEEDBACK_LOOPS_2                                                                 | -1.269 | 0.602 |
| PANTHER_MM_CORTOCOTROPIN_RELEASING_FACTOR_RECEPTOR_SIGNALING_PATHWAY                                    | -1.264 | 0.667 |
| PANTHER_MM_PI3_KINASE_PATHWAY                                                                           | -1.259 | 0.602 |
| BIOCARTA_MM_CD40L_SIGNALING_PATHWAY                                                                     | -1.248 | 0.704 |
| PANTHER_MM_PDGF_SIGNALING_PATHWAY                                                                       | -1.222 | 0.568 |
| PANTHER_MM_HISTAMINE_H1_RECEPTOR_MEDIATED_SIGNALING_PATHWAY                                             | -1.205 | 0.692 |
| PANTHER_MM_INTERLEUKIN_SIGNALING_PATHWAY                                                                | -1.188 | 0.656 |
| BIOCARTA_MM_INHIBITION_OF_CELLULAR_PROLIFERATION_BY_GLEEVEC                                             | -1.186 | 0.757 |
| PANTHER_MM_INSULIN_IGF_PATHWAY-MITOGEN_ACTIVATED_PROTEIN_KINASE_KINASE_MAP_KINASE_CASCADE               | -1.177 | 0.753 |
| BIOCARTA_MM_P53_SIGNALING_PATHWAY                                                                       | -1.094 | 0.808 |
| PANTHER_MM_OXIDATIVE_STRESS_RESPONSE                                                                    | -1.092 | 0.795 |
| BIOCARTA_MM_P38_MAPK_SIGNALING_PATHWAY                                                                  | -1.087 | 0.795 |
| BIOCARTA_MM KERATINOCYTE DIFFERENTIATION                                                                | -1.087 | 0.795 |
| BIOCARTA_MM_SKELETAL_MUSCLE_HYPERTROPHY_IS_REGULATED_VIA_AKT_MTOR_PATHWAY                               | -1.083 | 0.808 |
| PANTHER_MM_HYPOXIA_RESPONSE_VIA_HIF_ACTIVATION                                                          | -1.067 | 0.808 |
| BIOCARTA_MM_THE_4-1BB-DEPENDENT_IMMUNE_RESPONSE                                                         | -1.052 | 0.827 |
| PANTHER_MM_OXYTOCIN_RECEPTOR_MEDIATED_SIGNALING_PATHWAY                                                 | -1.050 | 0.824 |
| PANTHER_MM_5HT2_TYPE_RECEPTOR_MEDIATED_SIGNALING_PATHWAY                                                | -1.031 | 0.827 |
| PANTHER_MM_HISTAMINE_H2_RECEPTOR_MEDIATED_SIGNALING_PATHWAY                                             | -1.023 | 0.872 |
| BIOCARTA_MM_NEUROPEPTIDES_VIP_AND_PACAP_INHIBIT_THE_APOPTOSIS_OF_ACTIVATED_T_CELLS                      | -0.987 | 0.922 |
| BIOCARTA_MM_CERAMIDE_SIGNALING_PATHWAY                                                                  | -0.970 | 0.922 |
| FDR, false discovery rate. NES, normalised enrichment score                                             |        |       |

**Supplementary Table 2 | Antibodies**

| <b>Antibody</b>     | <b>Species</b> | <b>Source (catalogue number)</b>  | <b>Assays</b> | <b>Dilution</b>                 |
|---------------------|----------------|-----------------------------------|---------------|---------------------------------|
| αSMA                | mouse          | Sigma (clone 1A4)                 | IHC           | 1:1,000                         |
| CD24                | rat            | eBioscience (M1/69)               | FACS          | 4 μL/1x10 <sup>7</sup> cells/mL |
| CD45                | rat            | R&D Systems<br>(MAB114)           | FACS          | 4 μL/1x10 <sup>7</sup> cells/mL |
| Endo180 (human)     | mouse          | mAb 39.10 (in house) <sup>8</sup> | IHC           | 1:1,000                         |
| Endo180 (mouse)     | sheep          | R&D Systems<br>(AF4789)           | WB            | 1 μg/mL                         |
| Fibronectin         | rabbit         | Dako (A0245)                      | IF            | 1:2,000                         |
| MLC                 | rabbit         | Cell Signaling (3672)             | WB            | 1:1,000                         |
| p(ser19)-MLC        | mouse          | Cell Signaling (3675)             | WB            | 1:1,000                         |
| Alexa488-phalloidin | N/A            | Molecular Probes<br>(A12379)      | IF            | 1:500                           |
| Alexa555-phalloidin | N/A            | Molecular Probes<br>(A34055)      | IF            | 1:500                           |
| DAPI                | N/A            | Molecular Probes<br>(D1306)       | IF            | 1:10,000                        |
| IgG-HRP-anti-mouse  | donkey         | Santa Cruz (sc-2314)              | WB            | 1:10,000                        |
| IgG-HRP-anti-rabbit | goat           | Santa Cruz (sc-2004)              | WB            | 1:10,000                        |
| IgG-HRP-anti-sheep  | rabbit         | Santa Cruz (sc-2770)              | WB            | 1:10,000                        |

FACS, fluorescence activated cell sorting; IF, immunofluorescence; IHC, immunohistochemistry; WB, western blot.

---

**Supplementary Table 3 | Mission shRNA lentiviral particles targeting Endo180 (*Mrc2*) (Sigma)**

| <b>Clone ID</b> | <b>Gene target</b> | <b>NM ID</b> |
|-----------------|--------------------|--------------|
| SHC002V         | NTC                | N/A          |
| TRCN00001239-25 | <i>Mrc2</i>        | NM_008626.3  |
| TRCN00001239-27 | <i>Mrc2</i>        | NM_008626.3  |
| TRCN00001239-28 | <i>Mrc2</i>        | NM_008626.3  |

---

**Supplementary Table 4 | ON-TARGET *plus* siRNA targeting Endo180 (*Mrc2*) (Dharmacon)**

| <b>ID</b>   | <b>Gene target</b> | <b>NM ID</b> |
|-------------|--------------------|--------------|
| D-001810-01 | NTC                | N/A          |
| D-001810-04 | NTC                | N/A          |
| J-040940-09 | <i>Mrc2</i>        | NM_008626.3  |
| J-040940-12 | <i>Mrc2</i>        | NM_008626.3  |

# Supplementary Figure 1

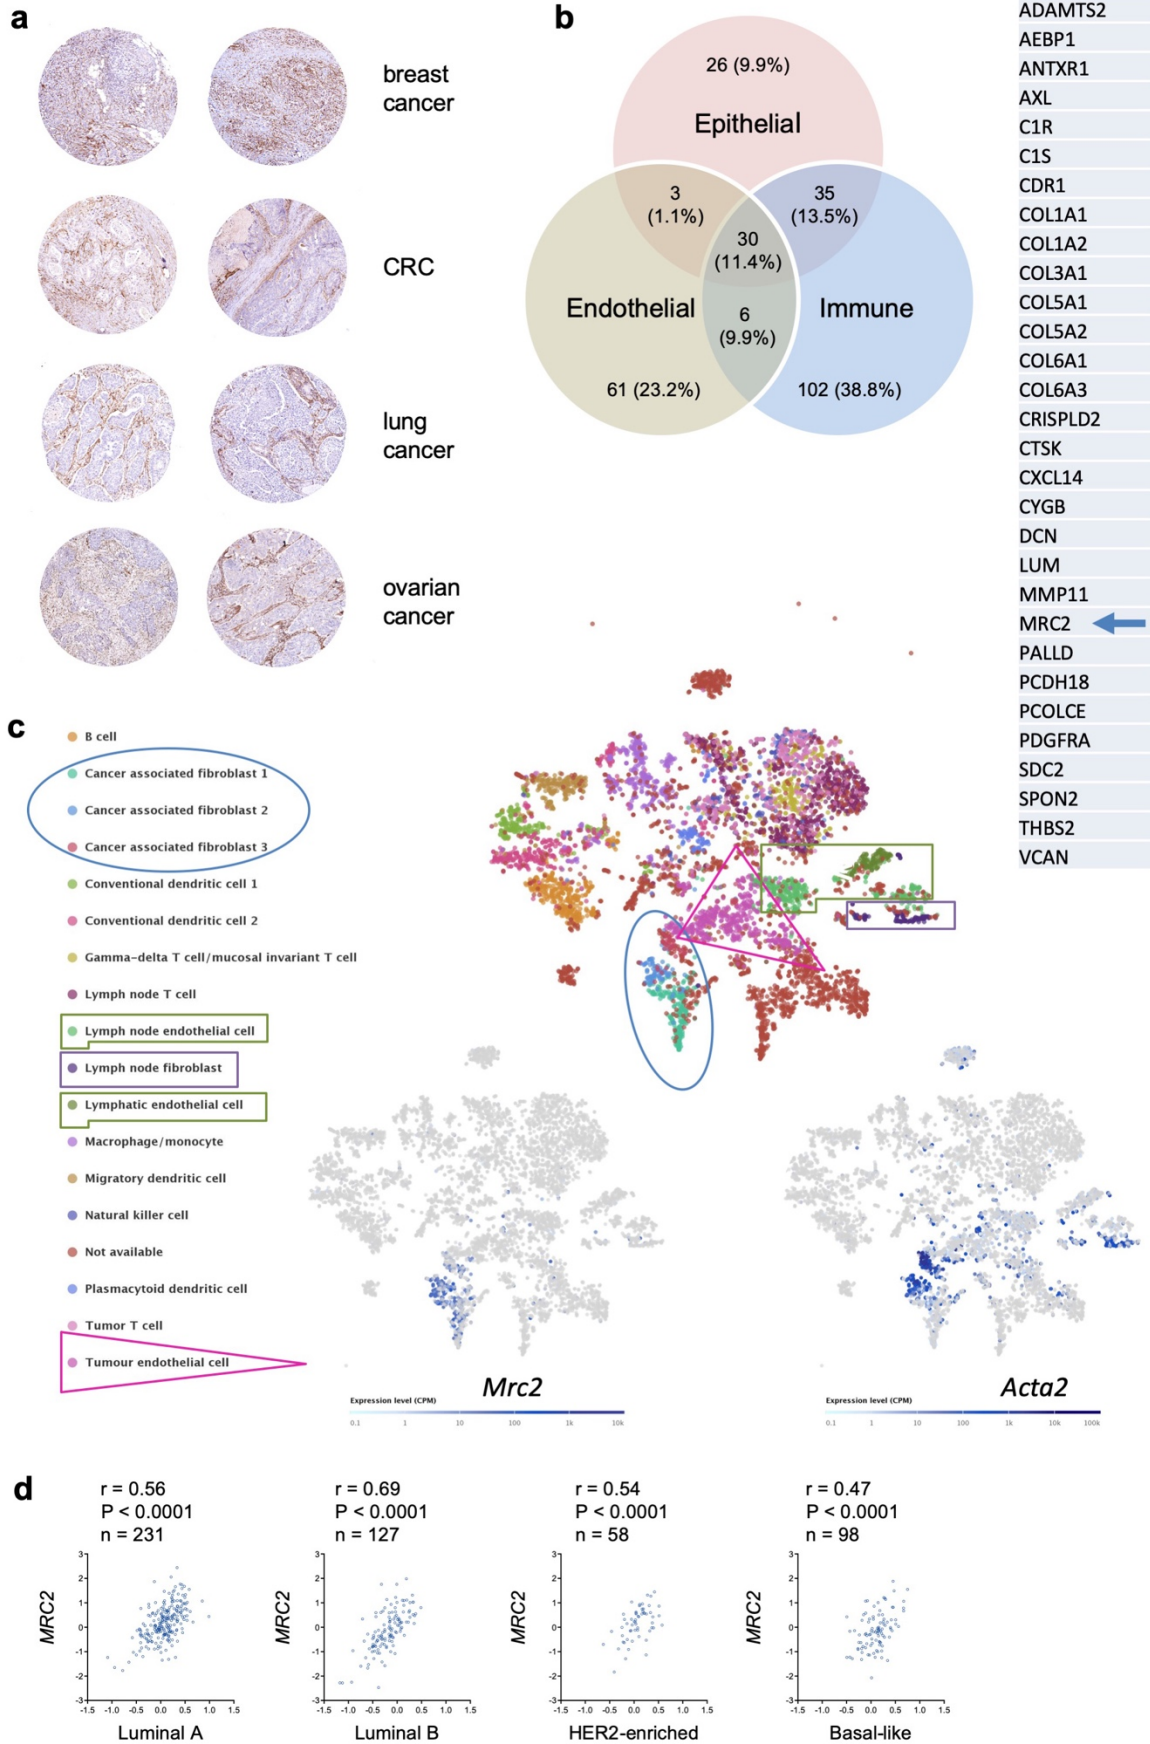

### Supplementary Fig. 1 | Fibroblast expression of Endo180 in solid tumours

**a** Images taken from The Human Protein Atlas ([www.proteinatlas.org](http://www.proteinatlas.org)) of breast, colorectal lung and ovarian tumours stained for Endo180. Related to Fig. 1a, where a comparable pattern of Endo180 staining in human breast cancers is observed using an independent antibody. **b** Left panel, upregulated expression of genes with  $P$  value  $< 10^{-11}$  in CAFs compared to endothelial, immune or epithelial/tumour cell populations from the human colorectal cancer GSE39397 dataset<sup>9</sup>. Right panel, list of the 30 genes commonly upregulated in CAF vs. endothelial, CAF vs. immune and CAF vs. epithelial/tumour cells, with Endo180 (*MRC2*) highlighted. Related to Fig. 1b. **c** tSNE visualisation of stromal cells and colour coded cell types isolated from primary B16-F10 mouse melanoma tumours and draining lymph nodes and subject to single cell RNA-seq ([bioRxiv doi.org/10.1101/467225](https://doi.org/10.1101/467225)). Expression of marker genes for each cell type, *Mrc2* (bottom left) and *Acta2* (bottom right) analysed from deposited data (<https://www.ebi.ac.uk/gxa/sc/experiments/E-EHCA-2/Results>). **d** Correlation of Endo180 (*MRC2*) gene expression with a fibroblast TGF $\beta$  response signature (F-TBRS)<sup>9</sup> in the luminal A, luminal B, HER2-enriched and basal-like breast cancer intrinsic subtypes in the TCGA dataset. Related to Fig. 1g.



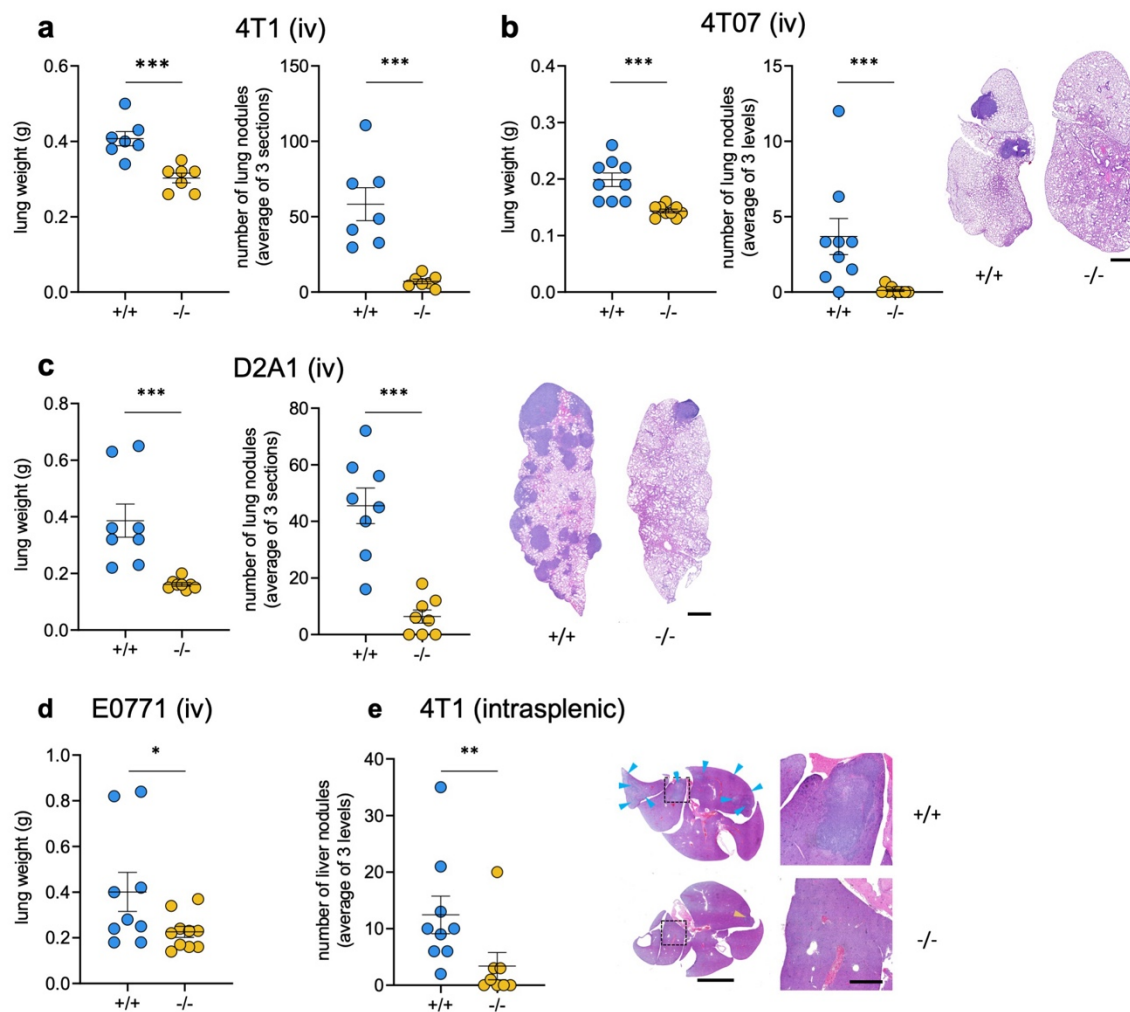

### Supplementary Fig. 2 | Endo180 promotes metastatic tumour growth in lungs and liver

Additional quantification of the data presented in Figure 3. All data are mean values  $\pm$ SEM. Quantification of metastatic nodules represents mean number of lung nodules in 3 lung or liver sections. **a** 4T1-Luc cells injected intravenously into BALB/c mice ( $n = 7$  per group) from Figure 3a. Shown are *ex vivo* lung weights (*t*-test) and number of metastatic lung nodules (*t*-test). **b** 4T07 cells injected intravenously into BALB/c mice ( $n = 9$  per group) from Figure 3b. Shown are *ex vivo* lung weights (*t*-test) and number of metastatic lung nodules (Mann-Whitney *U* test, scale bar, 1 mm). **c** D2A1 cells injected intravenously into BALB/c mice ( $n = 8$  per group) from Figure 3c. Shown are *ex vivo* lung weights (Mann-Whitney *U* test), number of metastatic lung nodules (*t*-test) and representative H&E stained sections (scale bar, 1 mm). **d** E0771-Luc cells injected intravenously into C57BL/6 mice ( $n = 9$  or 10 per group) from Figure 3e. Shown are *ex vivo* lung weights (Mann-Whitney *U* test). **e** 4T1-Luc cells injected into the spleen parenchyma of BALB/c mice ( $n = 8$  or 9 per group) from Figure 3f. Shown are number of metastatic liver nodules (Mann-Whitney *U* test) and low (scale bar, 5 mm) and high power (scale bar, 1 mm) images of H&E stained liver sections. Arrowheads indicate tumour nodules.

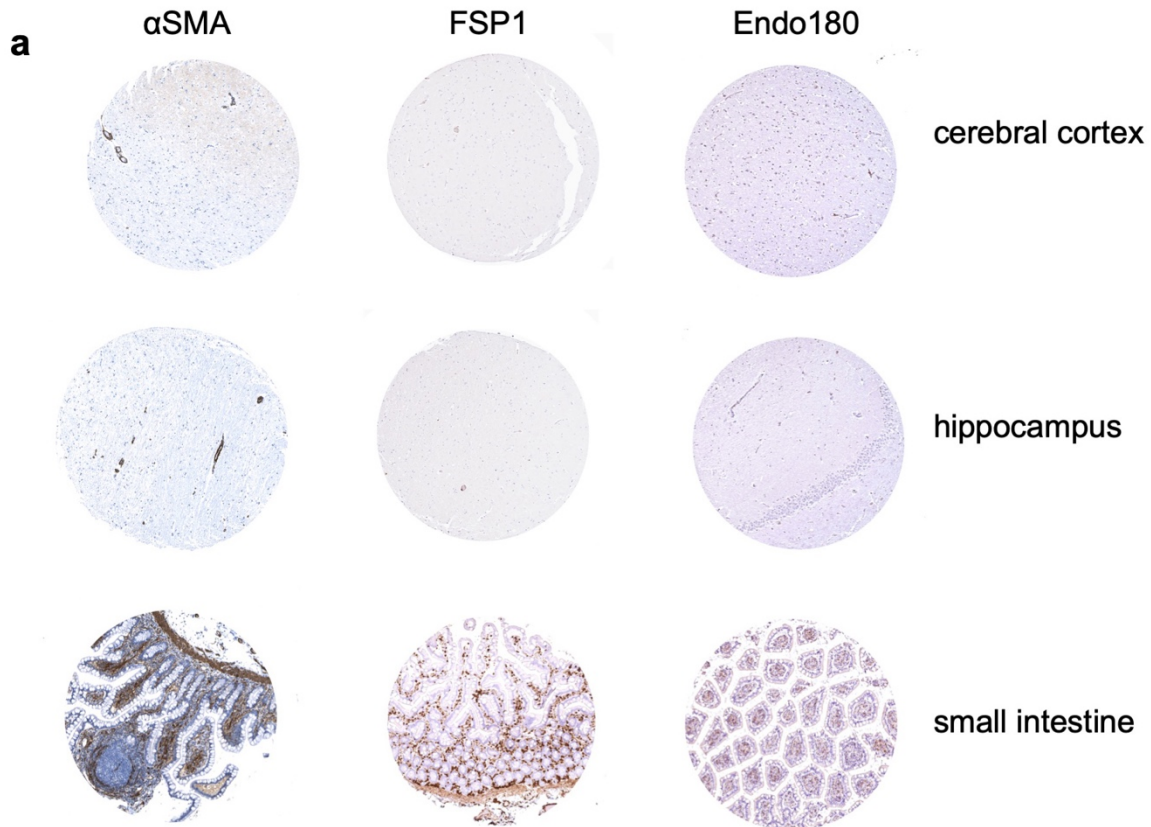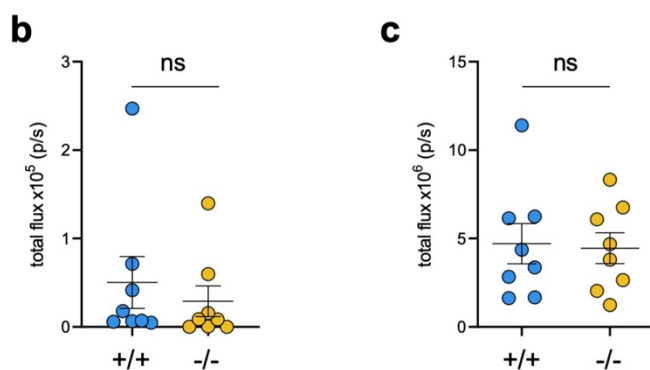

### Supplementary Fig. 3 | Expression of Endo180 in the brain

**a** Images taken from The Human Protein Atlas of brain (cerebral cortex and hippocampus) and small intestine stained for Endo180 and the fibroblast markers  $\alpha$ SMA and FSP1. **b**  $2.5 \times 10^3$  4T1-Luc cells were injected intracranially (supraventricular) into BALB/c mice ( $n = 8$  per group). Metastatic colonisation was measured by *ex vivo* IVIS imaging on day 12 (mean values  $\pm$ SEM, *t*-test, no significant differences). **c**  $3 \times 10^5$  4T1-Luc cells were injected into the left ventricle of the heart ( $n = 8$  per group) and metastasis to the brain monitored by *in vivo* IVIS imaging on day 10 (mean values  $\pm$ SEM, *t*-test, no significant differences). Related to Fig. 3.

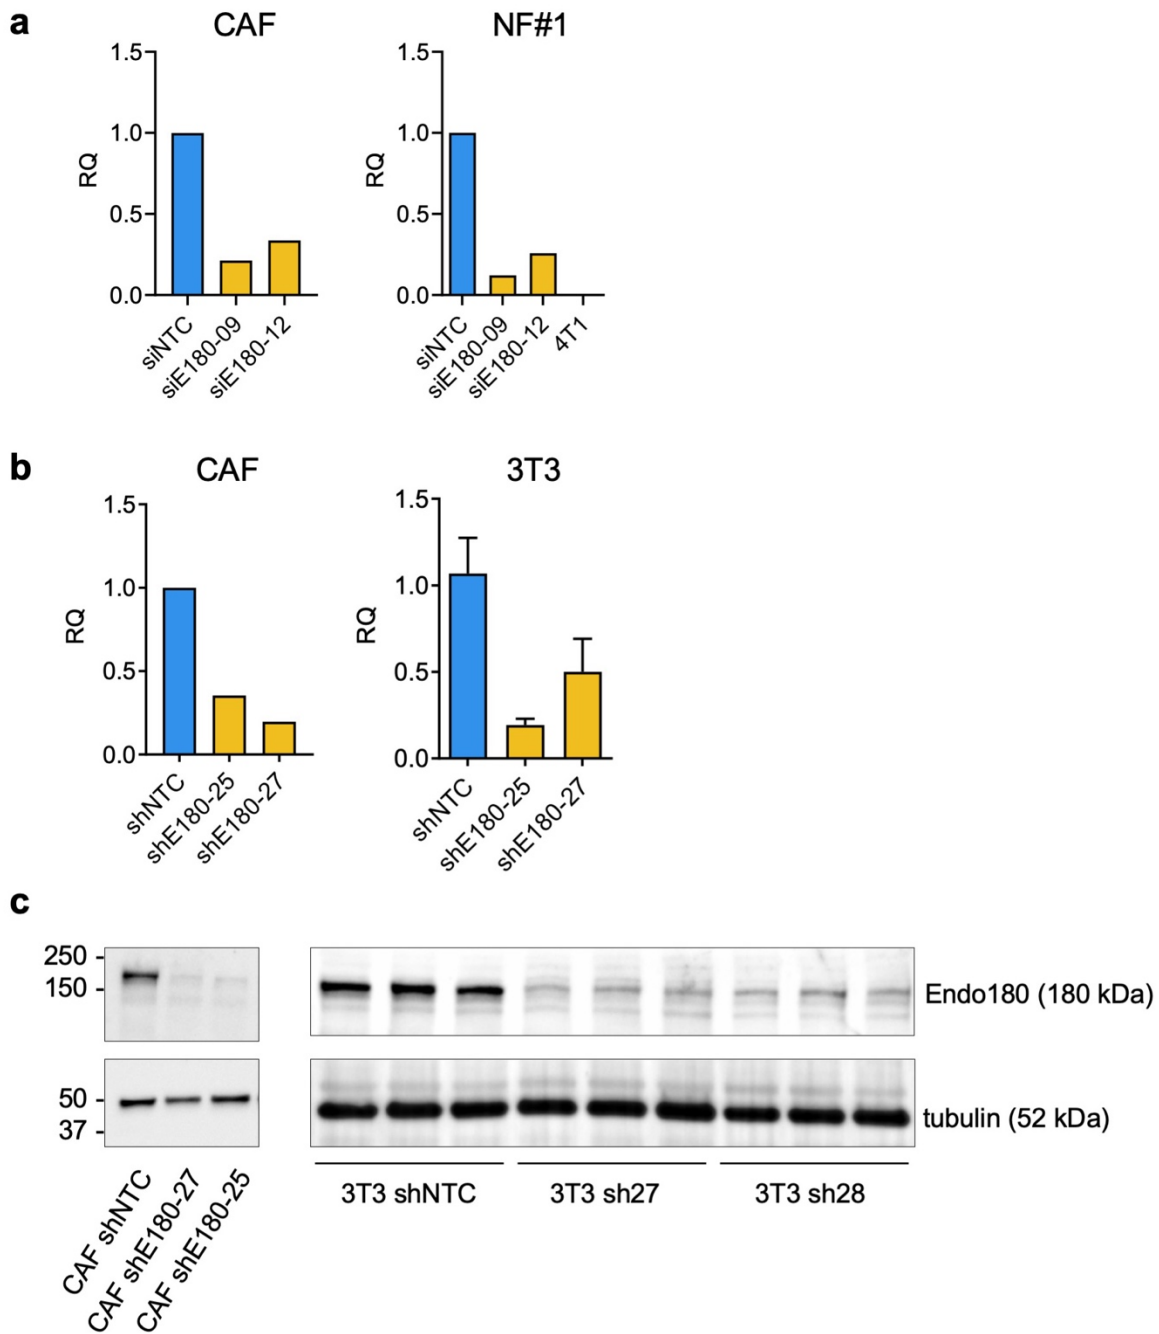

**Supplementary Fig. 4 | Endo180 expression following siRNA- or shRNA-mediated knockdown**

**a, b** Relative Endo180 (*Mrc2*) expression in CAFs and NF#1 and 3T3 mouse fibroblasts after transfection/ transduction with two independent (a) siRNAs or (b) shRNAs in comparison to non-targeting control (NTC) analysed by RT-qPCR. No expression was detected in 4T1 tumour cells. **c** Western blot of Endo180 (180 kDa) in CAFs (left panel) and 3T3 fibroblasts (right panel) transduced with either non-targeting control shRNA (shNTC) or two independent shRNAs against Endo180. Tubulin serves as loading control. Molecular size markers are in kDa. Related to Fig. 4.

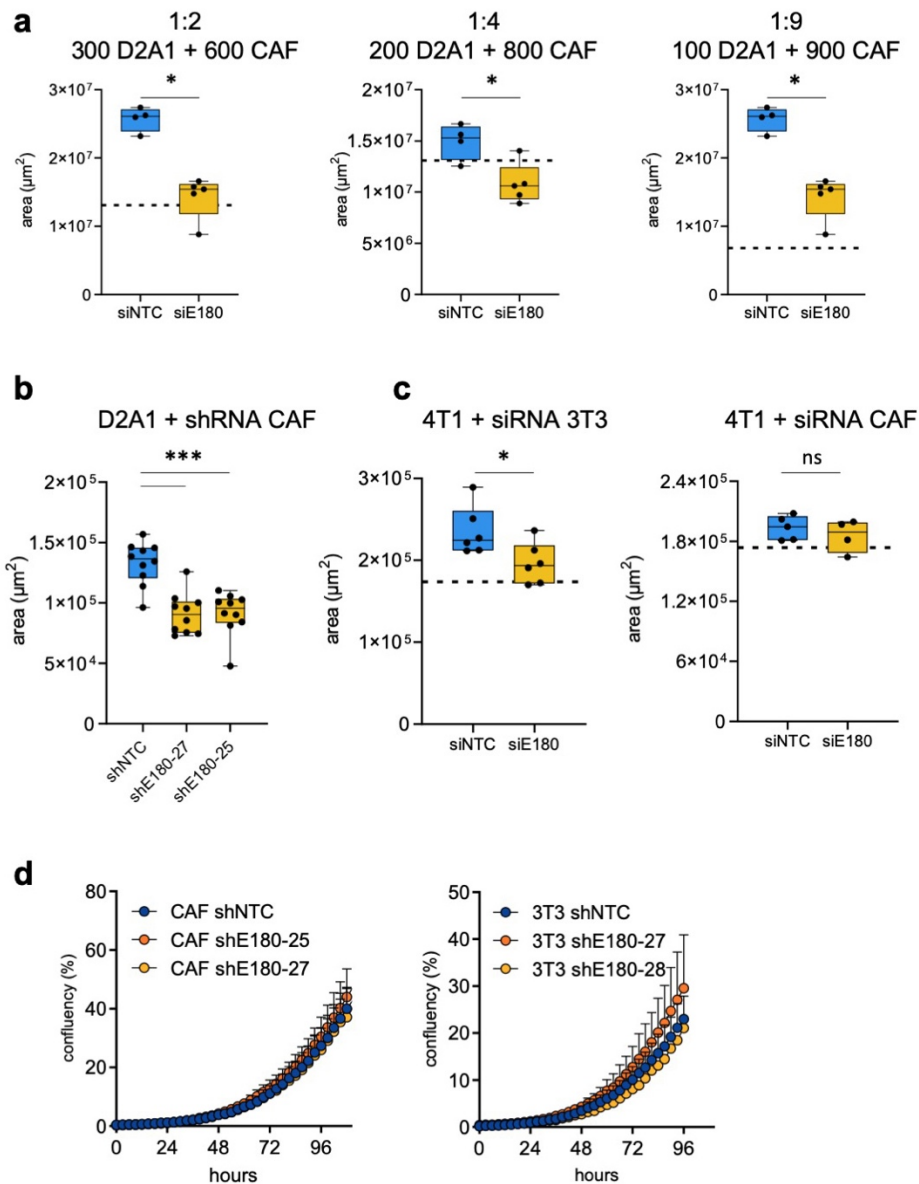

### Supplementary Fig. 5 | Fibroblast-tumour cell co-culture assays

In all experiments, fibroblasts were transfected with non-targeting control or Endo180 si/shRNAs. **a** Different ratio of D2A1 and CAF cells were co-cultured in U-bottom low adherence plates ( $n = 4-5$  spheroids per condition). Box plot shows median and 25<sup>th</sup> to 75<sup>th</sup> quartile, whiskers show minimum and maximum. Mean size of D2A1 spheroids alone is indicated by the dotted line (1:3 ratio, Mann-Whitney  $U$  test; 1:5 ratio  $t$ -test, 1:9 ratio Mann-Whitney  $U$  test). Related to Fig. 4a. **b** Equivalent results to panel a were obtained using CAFs transduced with shRNAs instead of siRNA. Shown are 1:3 ratio co-cultures of D2A1 and CAFs transduced with non-targeting (NTC) or two independent Endo180-targeting shRNAs after 6 days ( $n = 10$  spheroids per condition; mean values  $\pm$ SEM, one-way ANOVA). Related to Fig. 4a. **c** 4T1 cells admixed with 3T3 or CAFs in U-bottom low adherence plates and cultured for 8 days. Spheroid growth was assessed by spheroid area ( $n = 4-6$  spheres per condition, mean values  $\pm$ SEM,  $t$ -test). Related to Fig. 4b. **d** CAFs or 3T3 fibroblasts were cultured in 24-well plates in D2A1 conditioned medium prior to decellularisation. D2A1 cells were plated onto the fibroblast-derived matrices and growth monitored by IncuCyte imaging ( $n = 3$  wells per condition; mean values  $\pm$ SEM, 2-way ANOVA). Related to Fig. 4g.

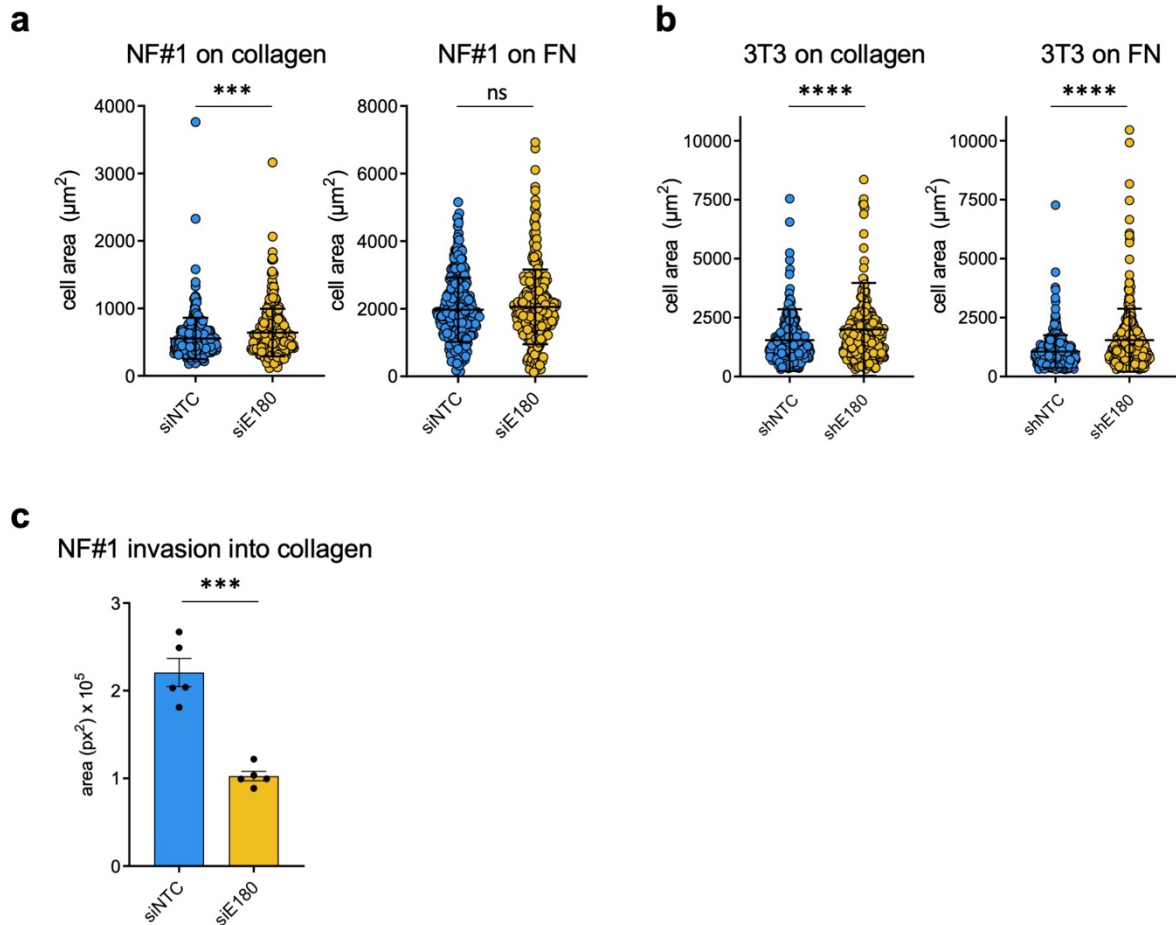

**Supplementary Fig. 6 | Cell spreading on collagen or fibronectin-coated hydrogels**

**a,b** Cell spreading (area) of siNTC and siEnd180 (siE180) NF#1 fibroblasts on collagen or fibronectin-coated hydrogels (50 kPa) and shNTC and shE180-27 3T3 fibroblasts on collagen or fibronectin-coated glass coverslips, respectively, ( $n = 300$  cells; mean values  $\pm$ SEM, Mann-Whitney  $U$  test). Related to Fig 5a,b. **c** Invasion of siNTC or siE180 NF#1 fibroblasts from 3D aggregates into a collagen matrix after 48 hours ( $n = 4$ ; mean values  $\pm$ SEM,  $t$ -test). Related to Fig. 5d.



## Supplementary Figure 7

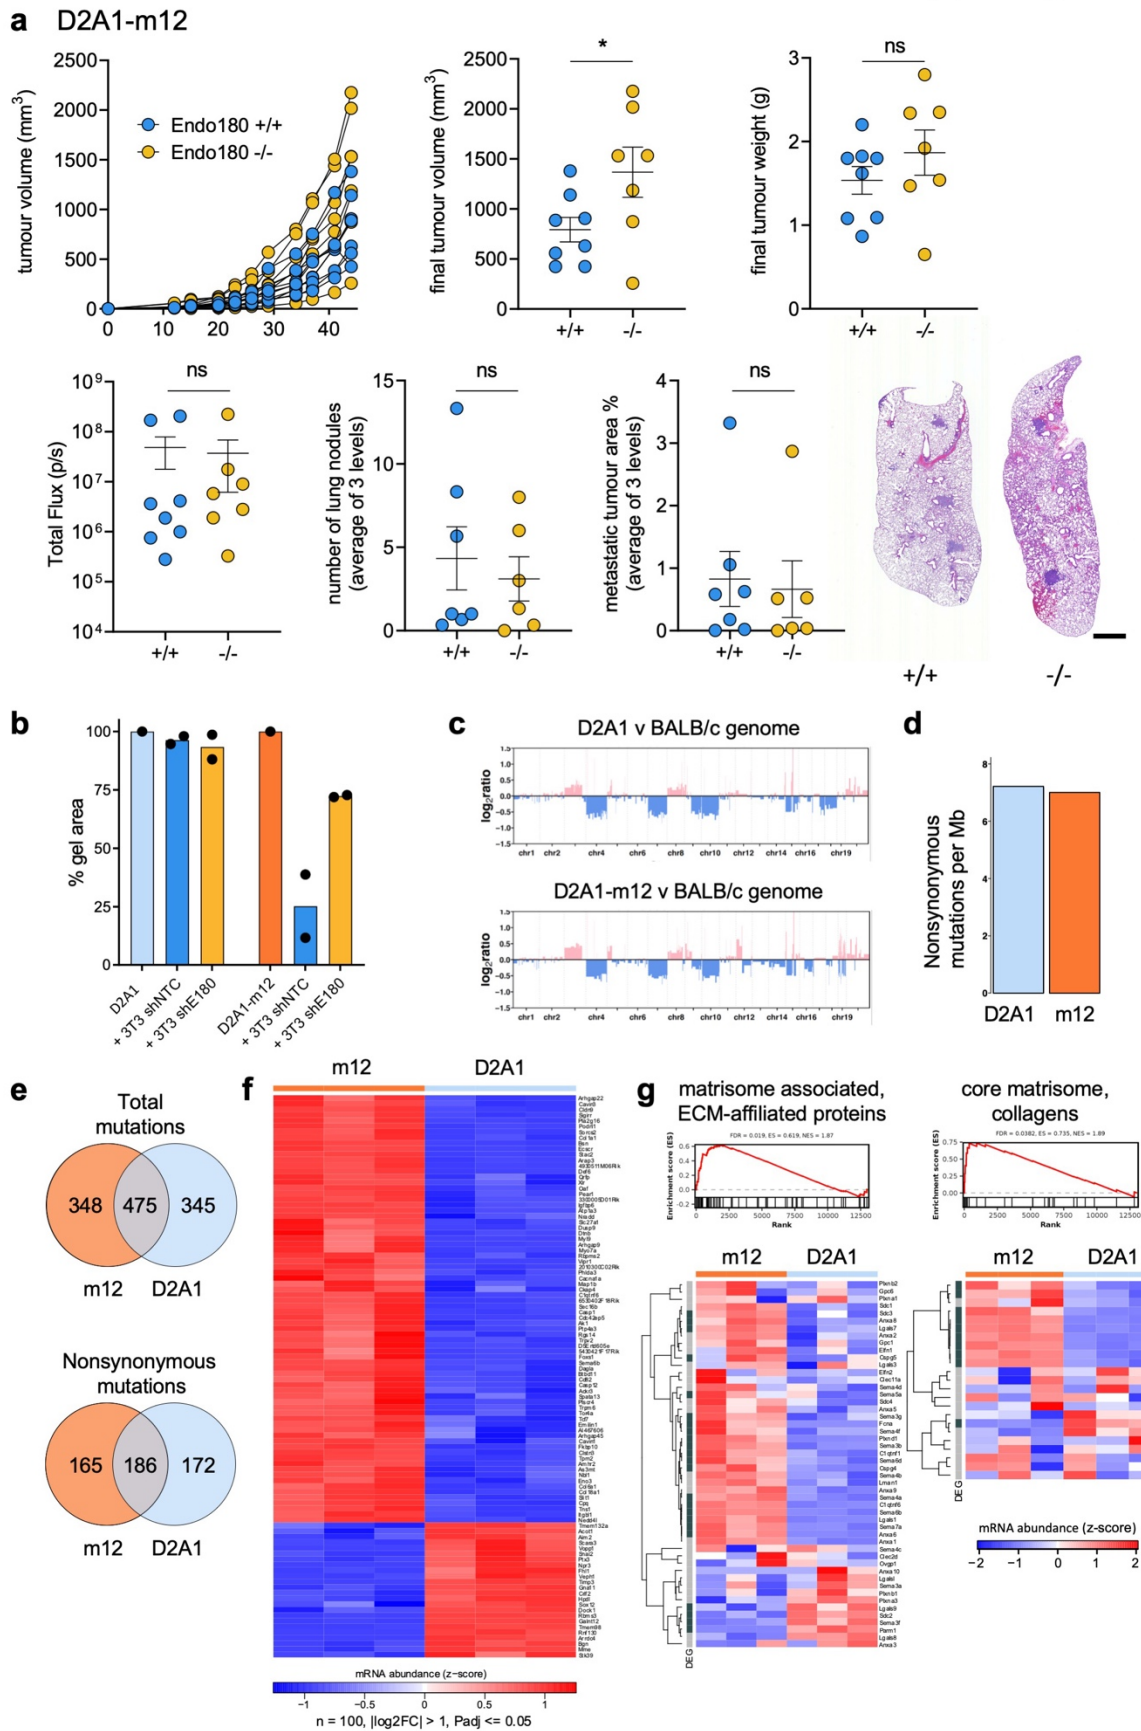



### Supplementary Fig. 7 | Comparison of the parental D2A1 line and the D2A1-m12 subline

**a**  $5 \times 10^4$  D2A1-m12-Luc cells were injected into the 4<sup>th</sup> mammary fat pad of BALB/c Endo180<sup>+/+</sup> or Endo180<sup>-/-</sup> mice (n = 8 per group) and tumour volume measured twice weekly. The experiment was terminated on day 41. Shown are: D2A1-m12 primary tumour growth in individual mice, final tumour volume, primary tumour weights, quantification of metastatic burden by *ex vivo* IVIS imaging of the lungs, number of lung nodules and metastatic tumour area in the lungs. All data are mean values  $\pm$ SEM (*t*-test). Representative H&E stained lung sections are shown (scale bar, 1 mm). Related to Fig. 7b. **b** shNTC or shEndo180 3T3 fibroblasts were embedded in a 1:1 ratio (each  $5 \times 10^5$  mL<sup>-1</sup>) with either D2A1 or D2A1-m12 tumour cells in collagen gels. Data show % gel contraction after 48 hours (n = 2). **c** Copy number variation plots ( $\log_2$  ratio) for D2A1 and D2A1-m12 cell lines using a reference BALB/c genome. **d** Tumour mutational burden of D2A1 and D2A1-m12 cell lines as determined using whole-exome sequencing (WES). **d** number of protein-coding nonsynonymous mutations per Mb of exome. **e** Venn diagrams illustrating the number of total mutations and nonsynonymous mutations in common between the D2A1 and D2A1-m12 cell lines. **f** Heatmap displaying mRNA abundance of top 100 significantly differentially expressed genes (DEGs) determined by RNA-seq, in D2A1-m12 compared with D2A1 cells (n = 3; heatmap scale is a z-score). Threshold for differential expression was  $|\log_2FC| > 1$ , and adjusted *P* value  $\leq 0.05$ . **g** fGSEA of 'core matrisome, collagens' and 'matrisome-associated, ECM-affiliated proteins', and associated heatmaps showing the genes of the pathway (n = 3; heatmap scale is a z-score). Dark grey, significant DEGs with  $|\log_2FC| > 1$  and adjusted *P* value  $\leq 0.05$ . Light grey, nonsignificant DEGs. Related to Fig. 7f.



## References

1. Di Tommaso, P. *et al.* Nextflow enables reproducible computational workflows. *Nat Biotechnol* **35**, 316-319 (2017).
2. Li, H. & Durbin, R. Fast and accurate long-read alignment with Burrows-Wheeler transform. *Bioinformatics* **26**, 589-595 (2010).
3. Li, H. *et al.* The Sequence Alignment/Map format and SAMtools. *Bioinformatics* **25**, 2078-2079 (2009).
4. McKenna, A. *et al.* The Genome Analysis Toolkit: a MapReduce framework for analyzing next-generation DNA sequencing data. *Genome Res* **20**, 1297-1303 (2010).
5. Talevich, E., Shain, A.H., Botton, T. & Bastian, B.C. CNVkit: Genome-Wide Copy Number Detection and Visualization from Targeted DNA Sequencing. *PLoS Comput Biol* **12**, e1004873 (2016).
6. Wilm, A. *et al.* LoFreq: a sequence-quality aware, ultra-sensitive variant caller for uncovering cell-population heterogeneity from high-throughput sequencing datasets. *Nucleic Acids Res* **40**, 11189-11201 (2012).
7. Wang, K., Li, M. & Hakonarson, H. ANNOVAR: functional annotation of genetic variants from high-throughput sequencing data. *Nucleic Acids Res* **38**, e164 (2010).
8. Wienke, D. *et al.* The collagen receptor Endo180 (CD280) is expressed on basal-like breast tumor cells and promotes tumor growth in vivo. *Cancer Research* **67**, 10230-10240 (2007).
9. Calon, A. *et al.* Dependency of colorectal cancer on a TGF-beta-driven program in stromal cells for metastasis initiation. *Cancer cell* **22**, 571-584 (2012).
